# Supplementary figures and images for: Cowpox Viruses: A Zoo Full of Viral Diversity and Lurking Threats
Source: MDPI journal article supplement (doi:10.3390/biom13020325), 2023-02-08

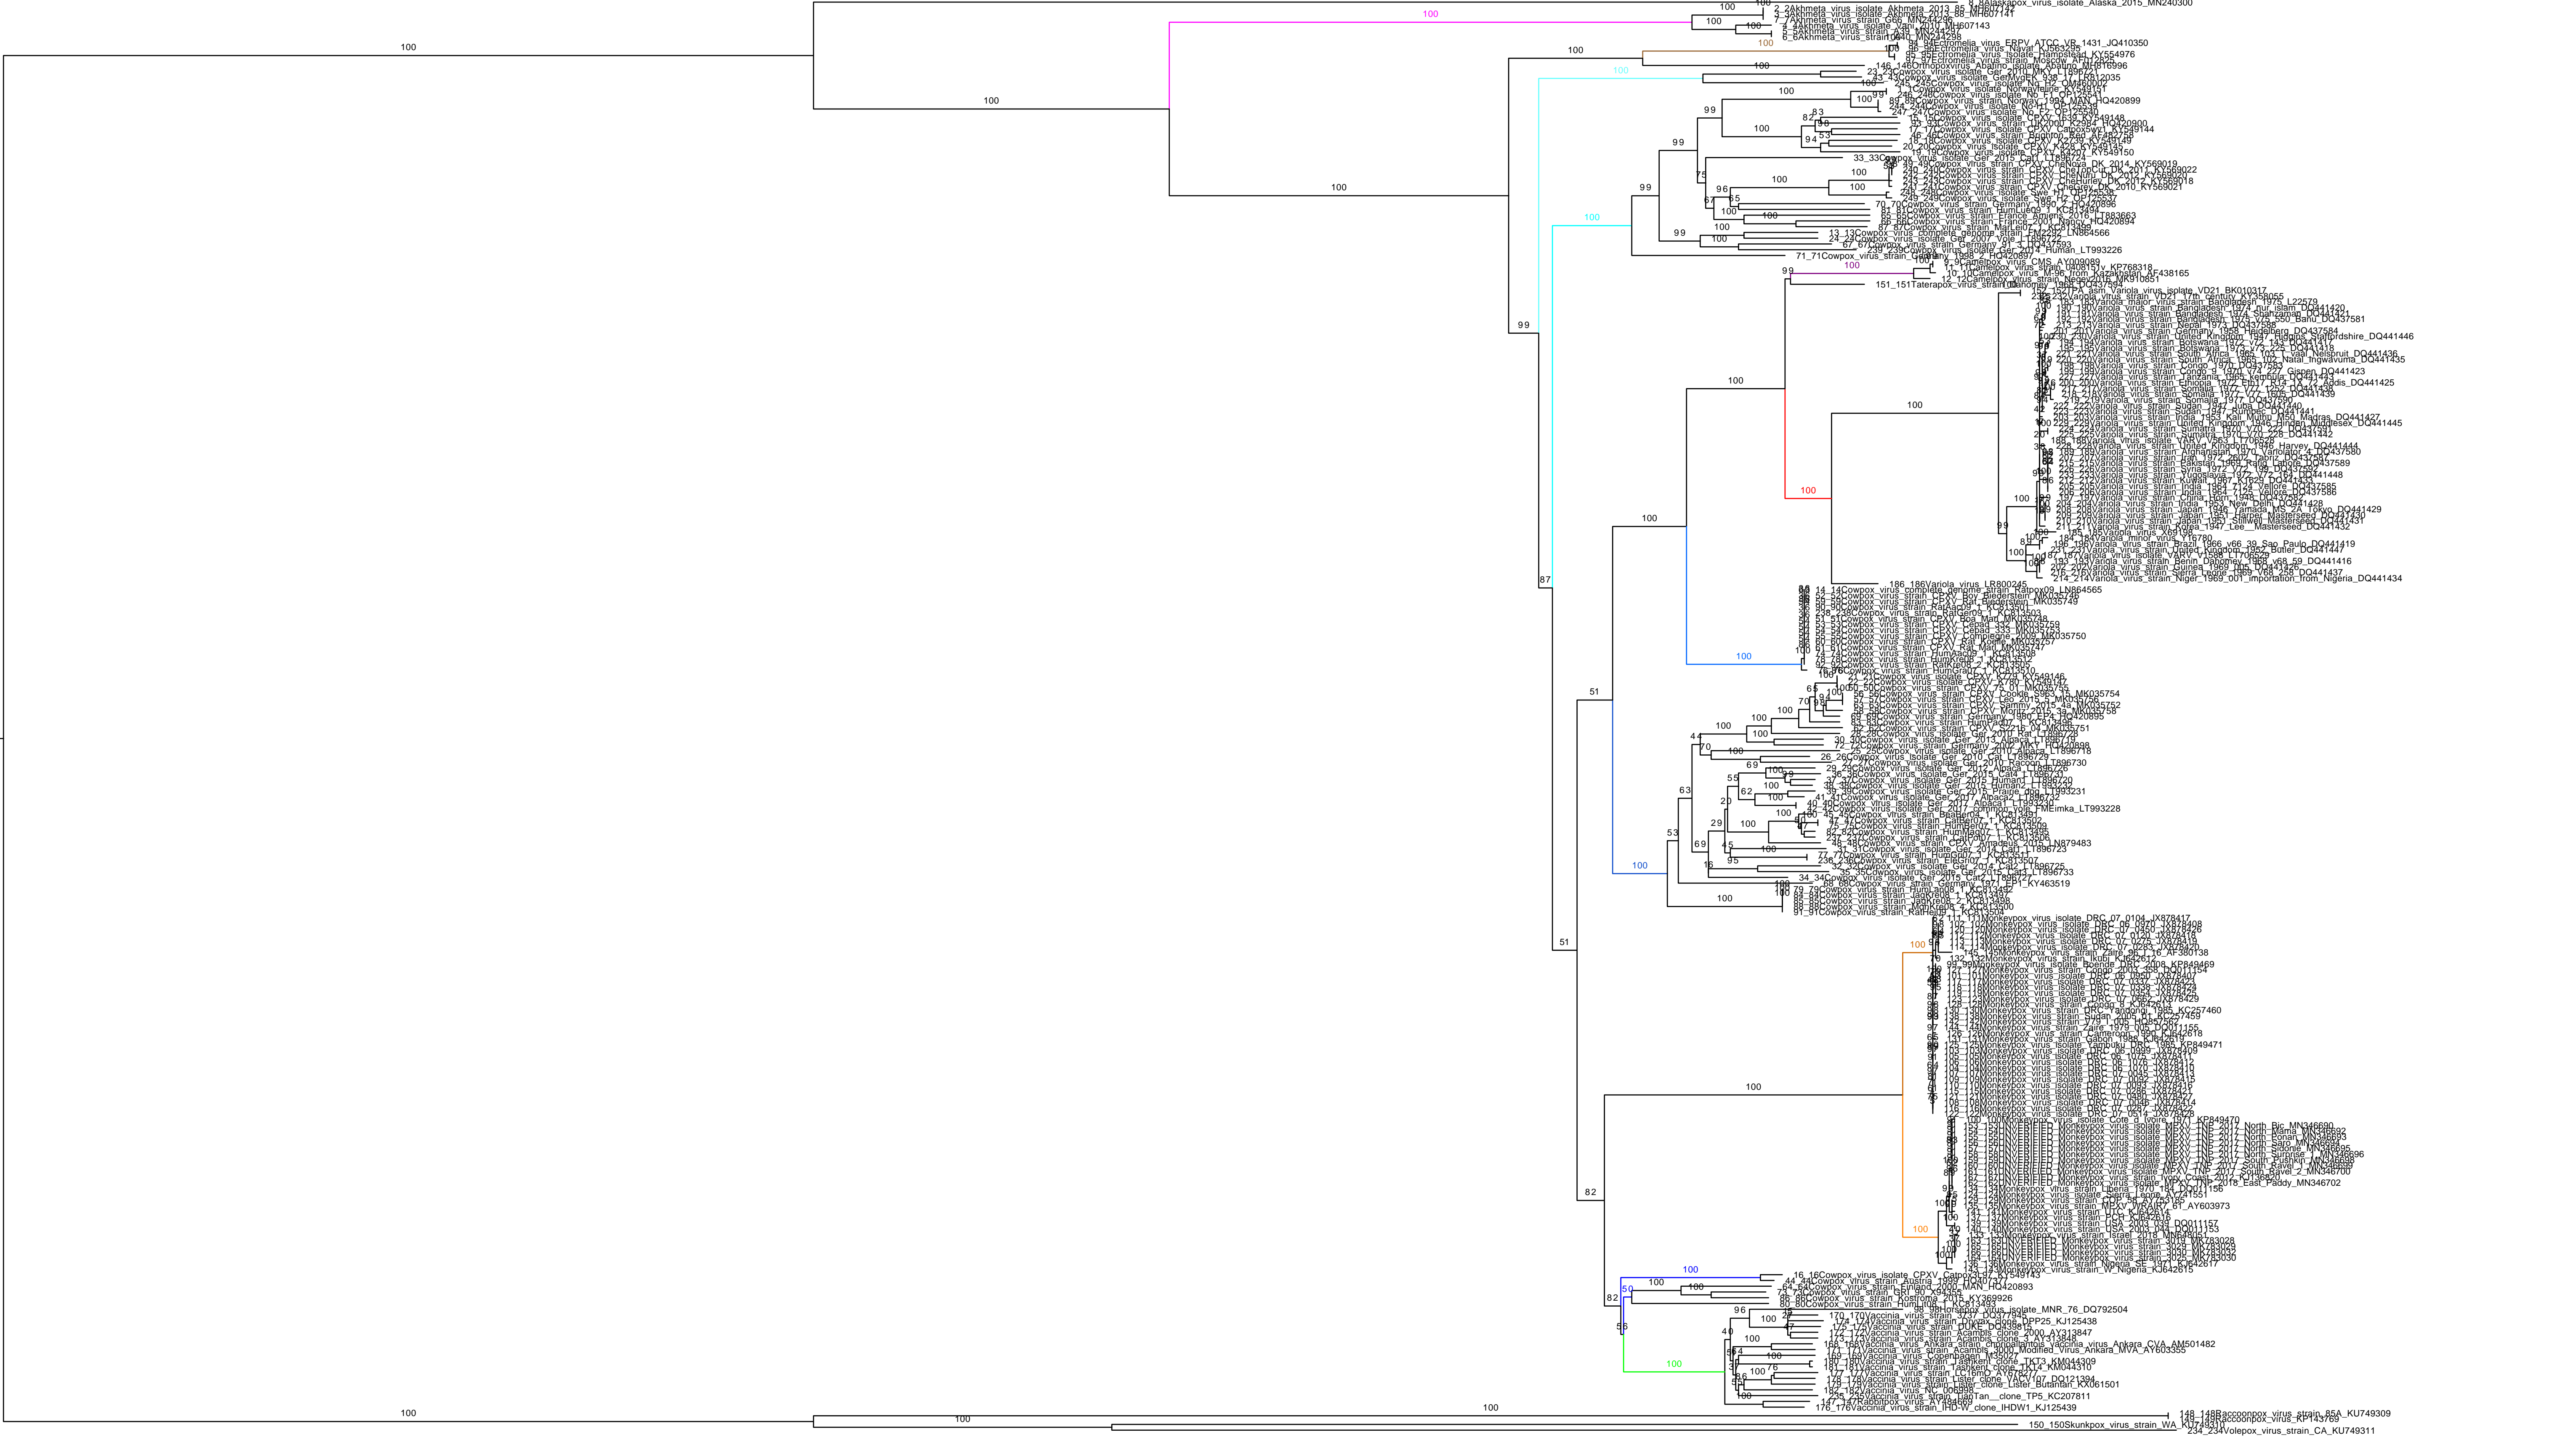

Supplement: s1 [file s1]
